# Supplementary material for: Surface- and tip-enhanced Raman spectroscopy reveals spin-waves in iron oxide nanoparticles
Source: Royal Society of Chemistry journal article supplement (doi:10.1039/c5nr01277e), 2015-01-01

## Electronic supplementary information (ESI)

### Spin-waves in Iron Oxide Nanoparticles by Surface- and Tip-Enhanced Raman Spectroscopy

by Raul D. Rodriguez, et al.

Indexation of  
nanoparticle  
sides and  
orientation with  
respect to the tip

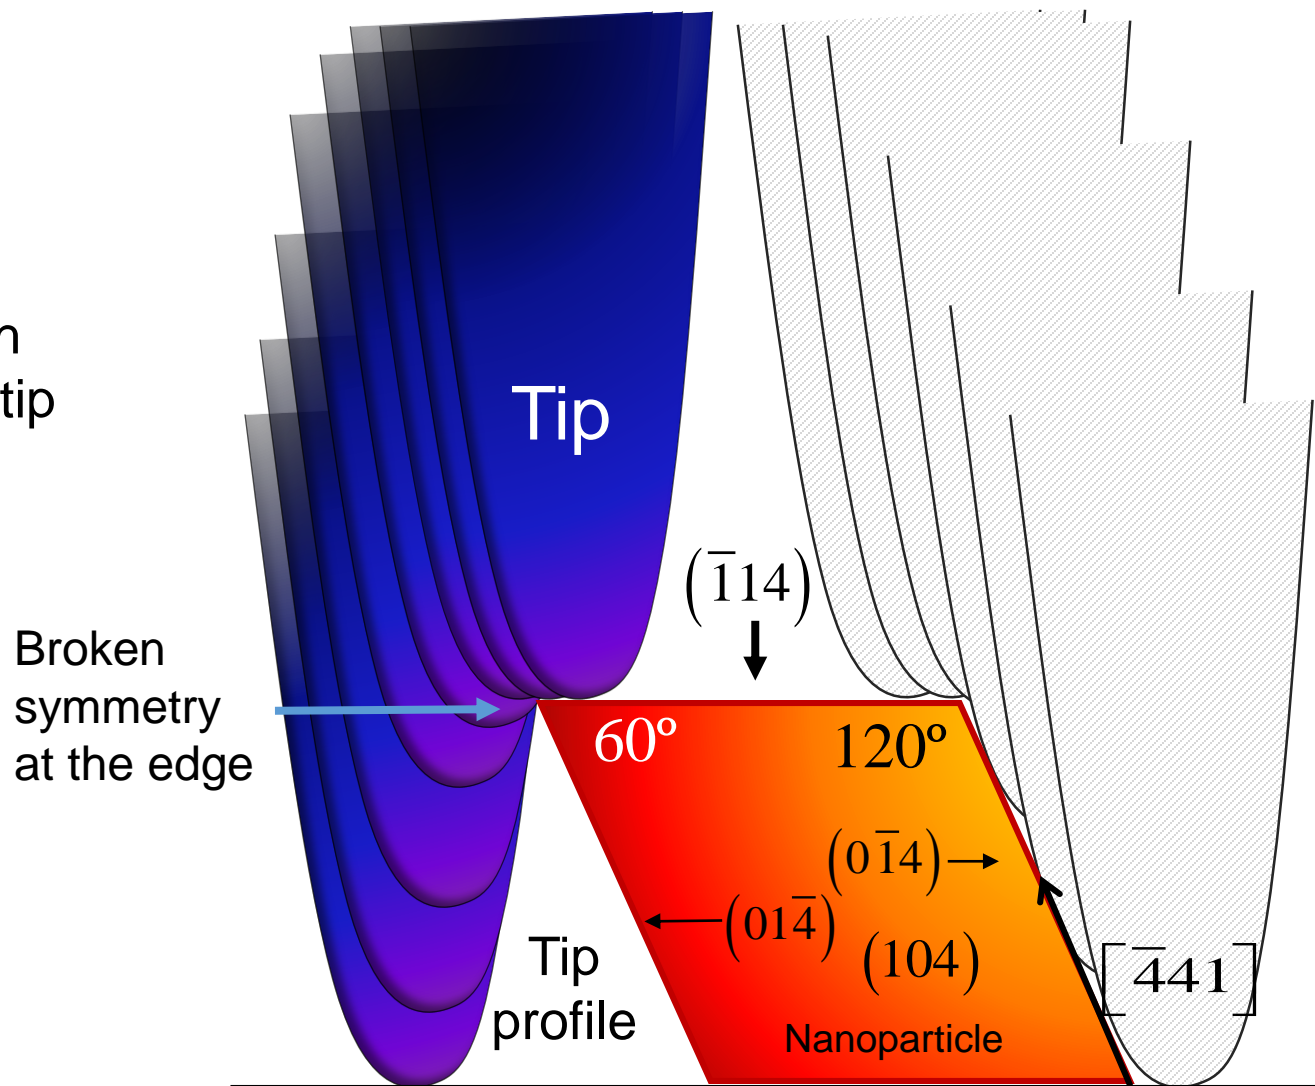

Supplement: c5nr01277e1.pdf [file c5nr01277e1.pdf]
